# Supplementary material
Source: PubMed Central journal article supplement (PMC10197841)
Supplement: 12931_2023_2438_MOESM10_ESM.pdf [file 12931_2023_2438_MOESM10_ESM.pdf]

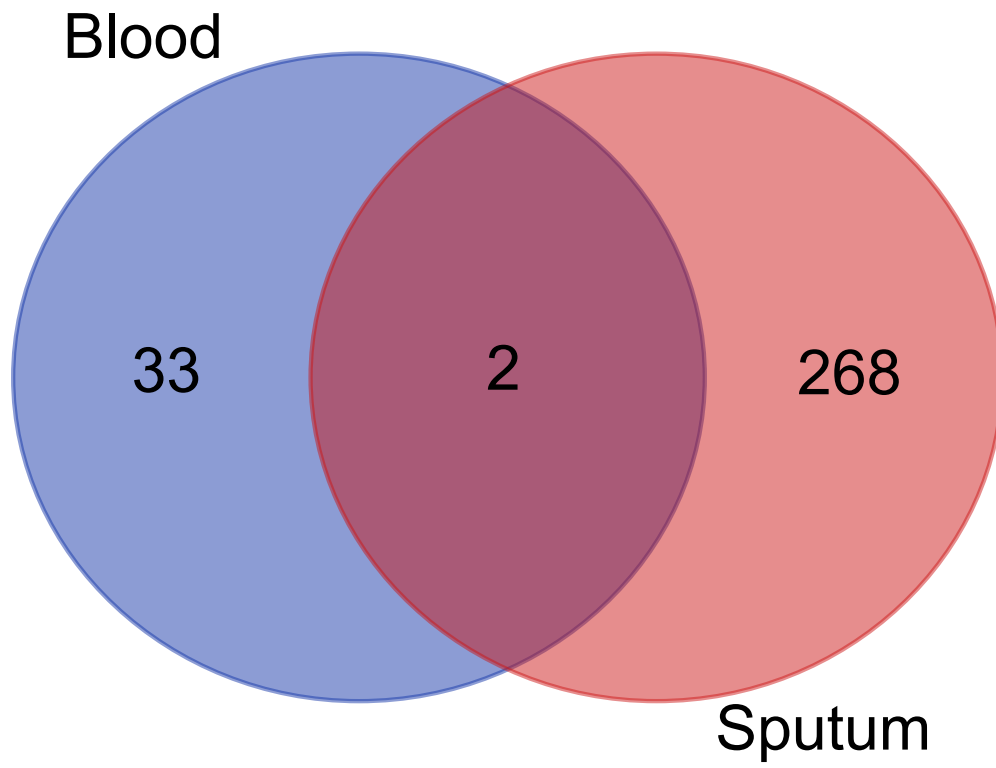

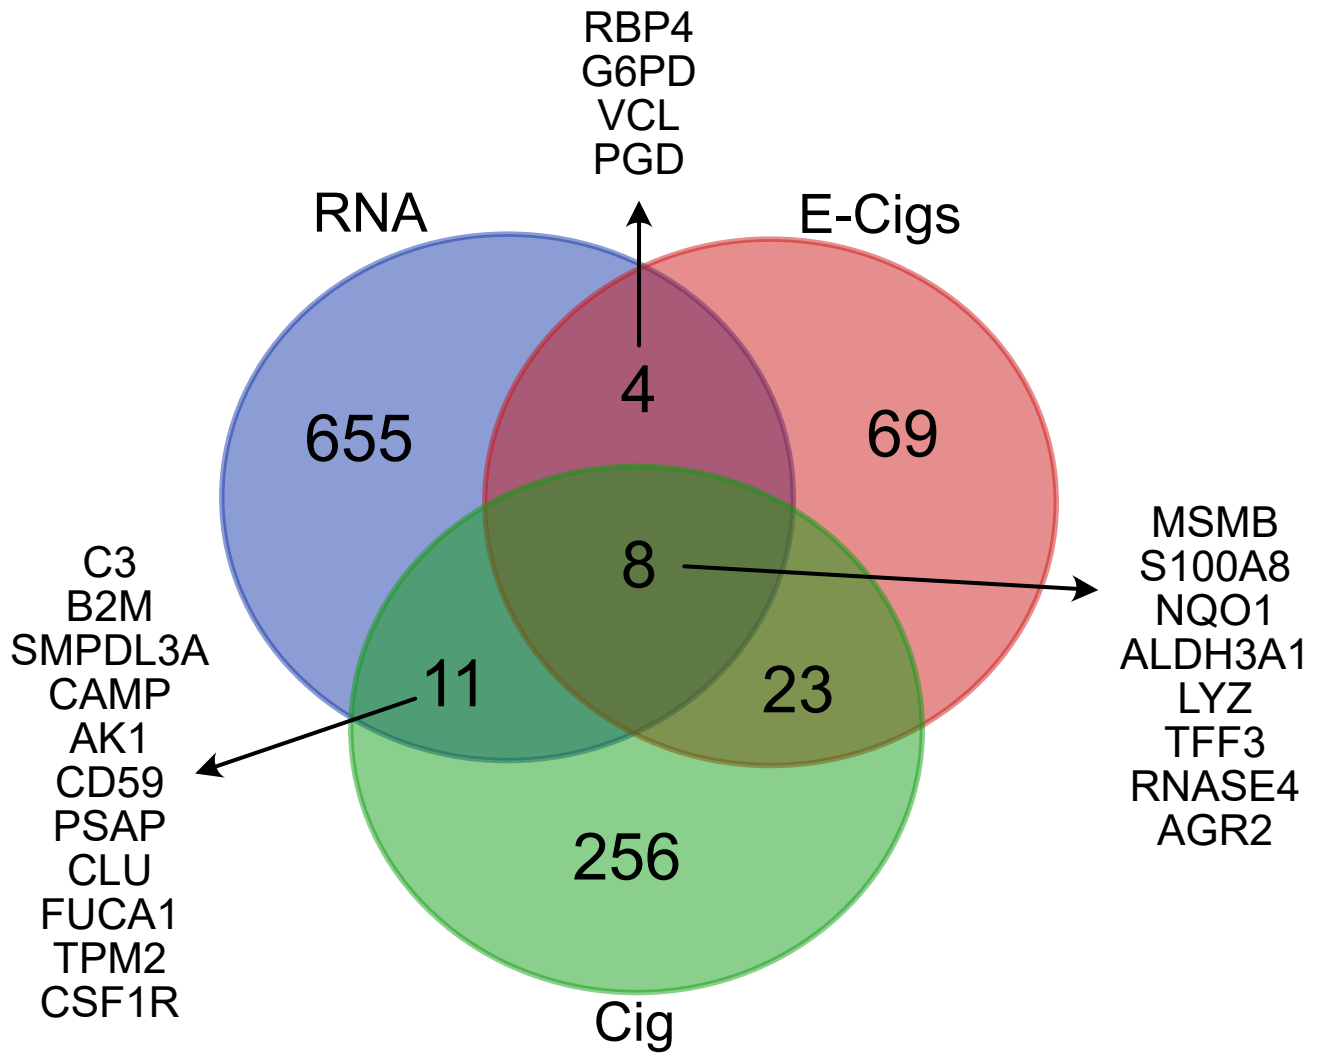

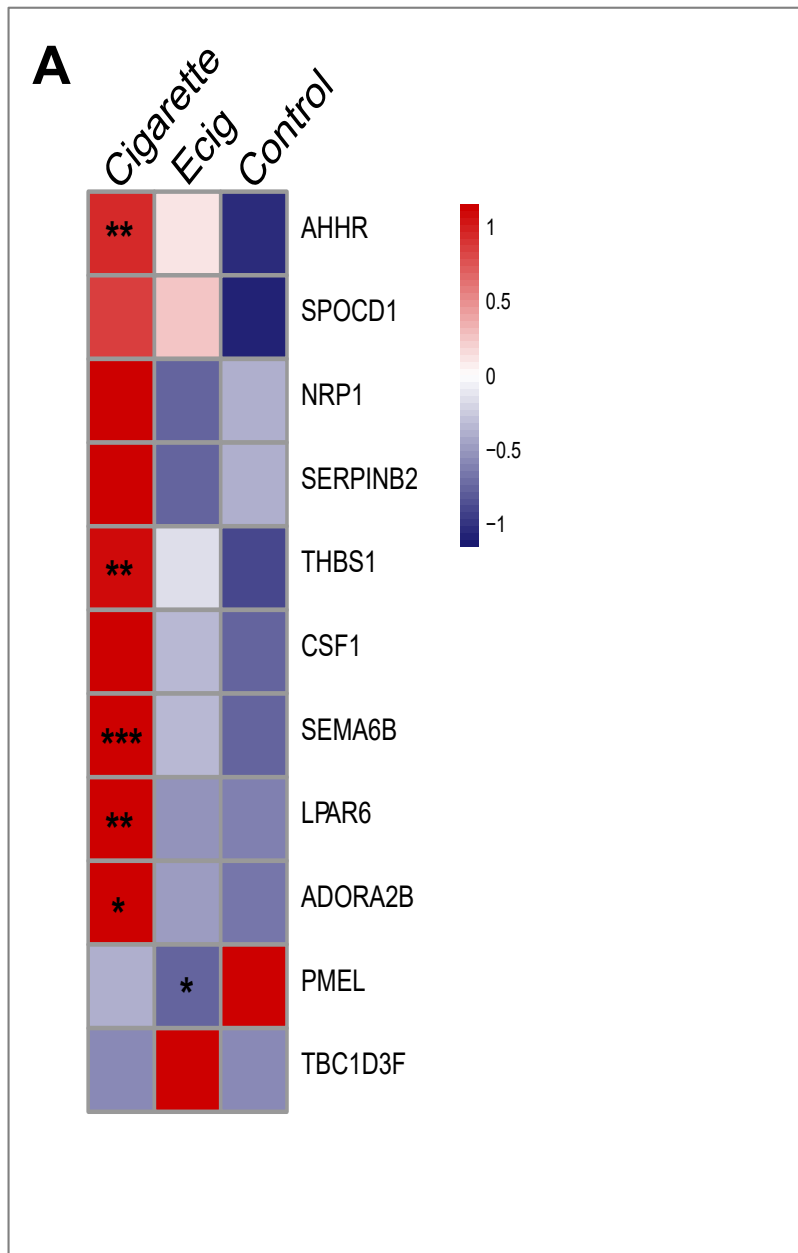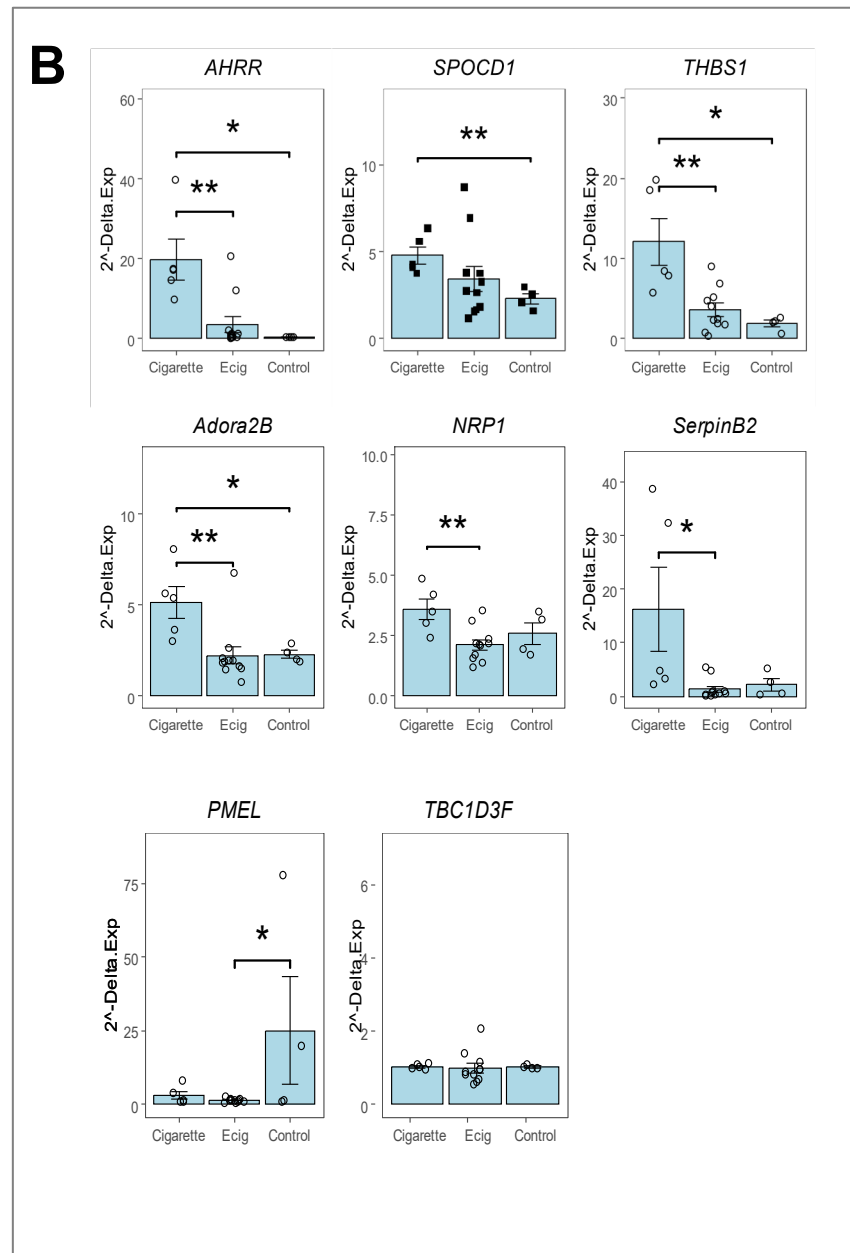

Supplemental Figure 3

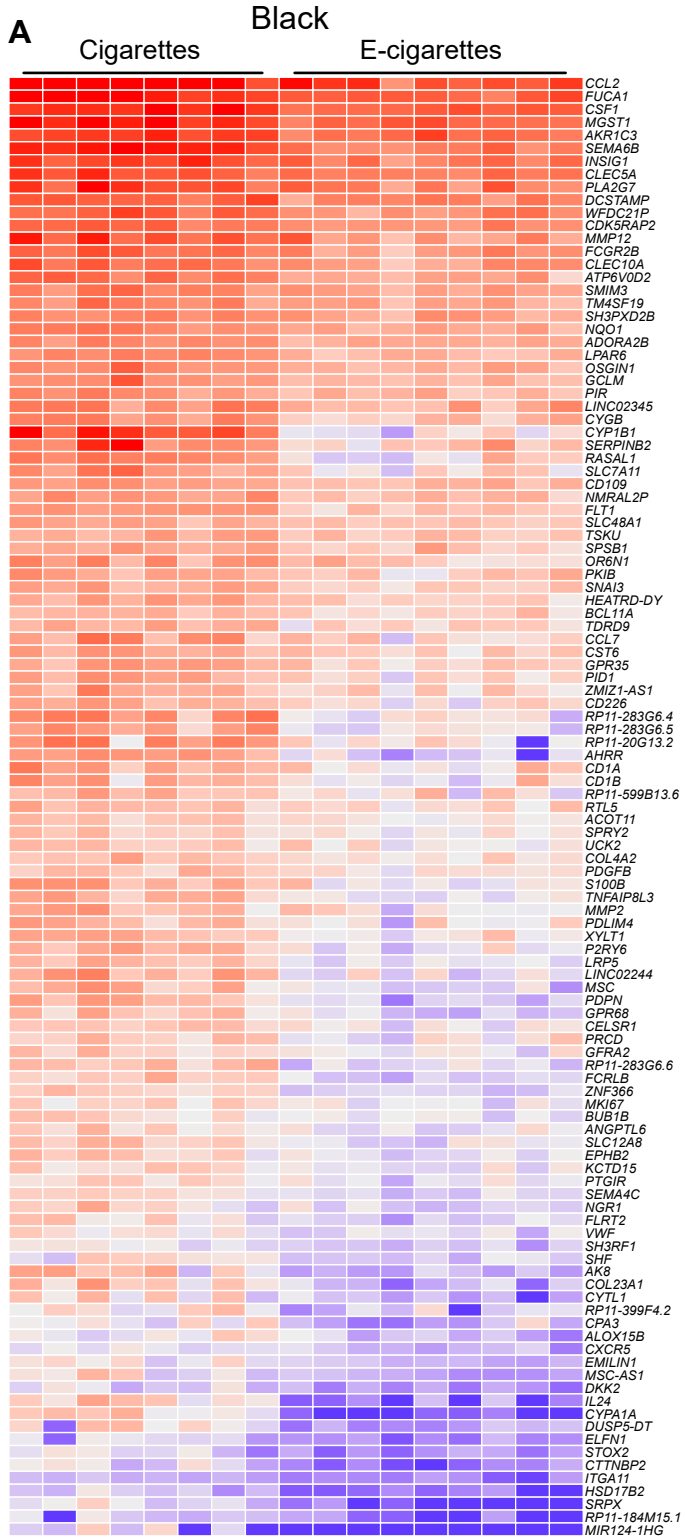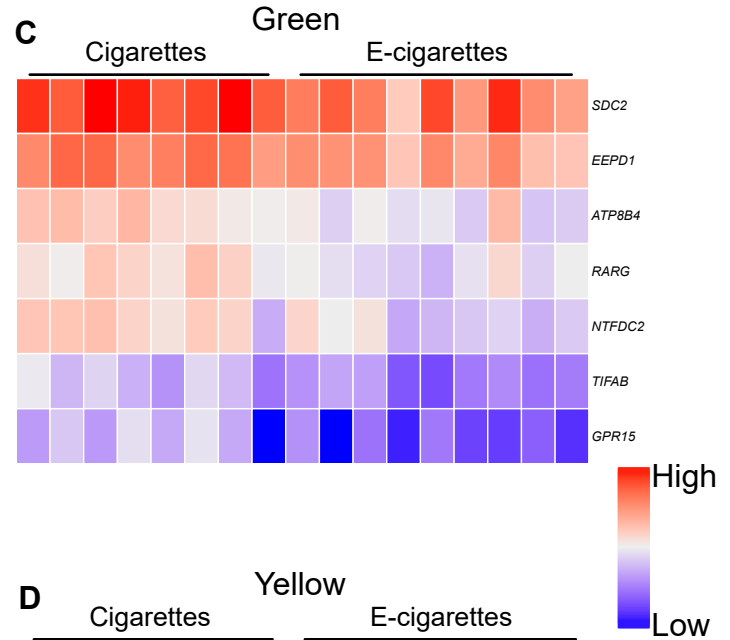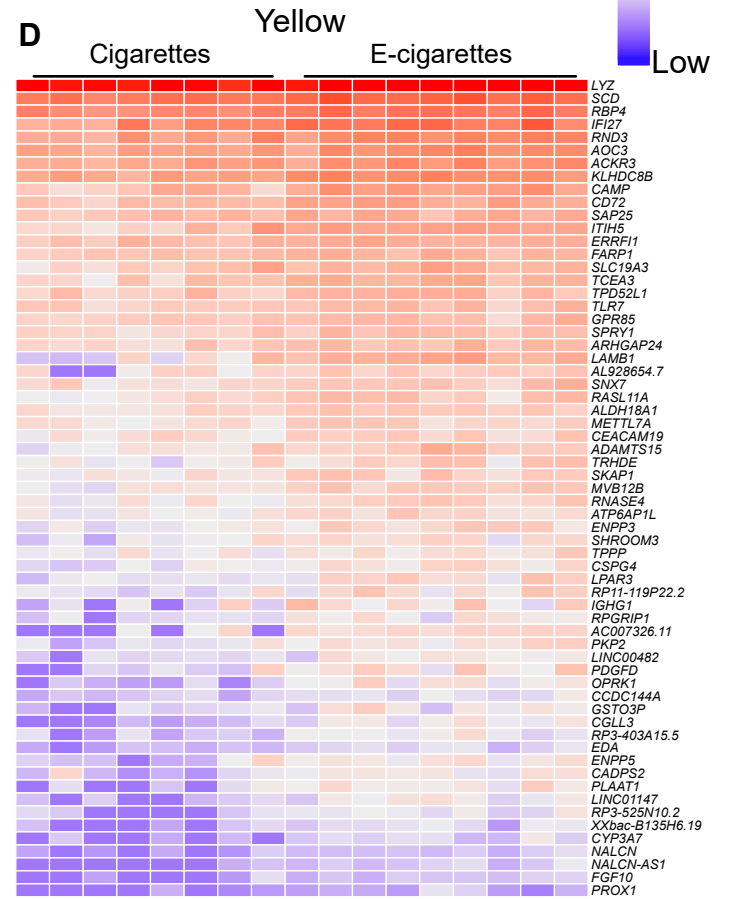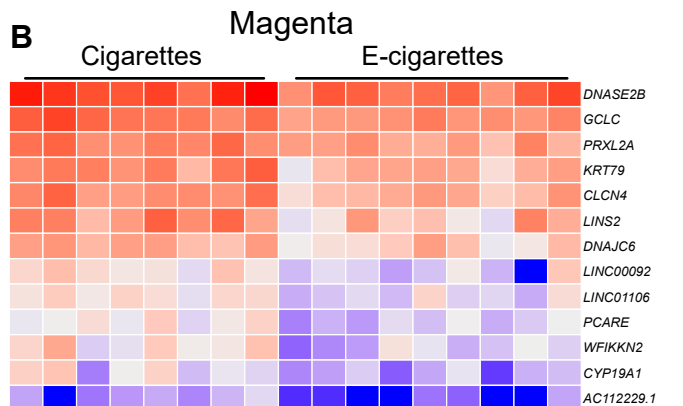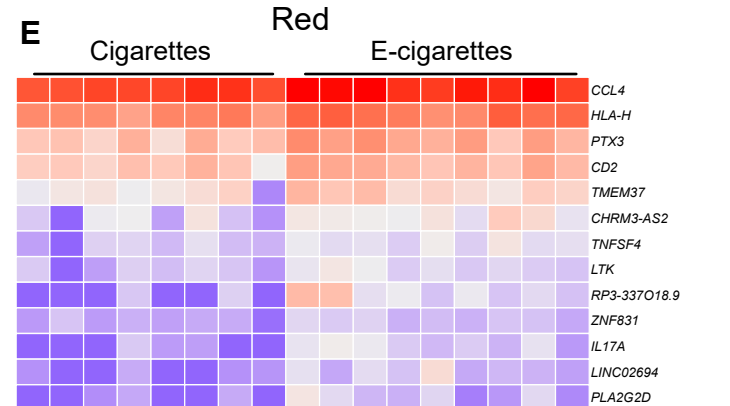

Supplemental Figure 4
